# Supplementary material
Source: Elsevier journal article supplement (https://rcastoragev2.blob.core.windows.net/ce621741e640ab9e3d164c54f799683e/mmc1.pdf)
Supplement: mmc1 [file mmc1.pdf]

**Cell Metabolism, Volume 33**

**Supplemental information**

**Gut-brain communication by distinct  
sensory neurons differently controls  
feeding and glucose metabolism**

**Diba Borgmann, Elisa Ciglieri, Nasim Biglari, Claus Brandt, Anna Lena Cremer, Heiko Backes, Marc Tittgemeyer, F. Thomas Wunderlich, Jens C. Brüning, and Henning Fenselau**

**A**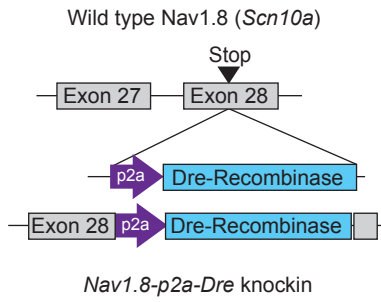**B**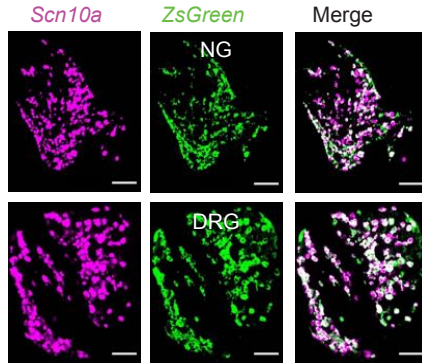**C**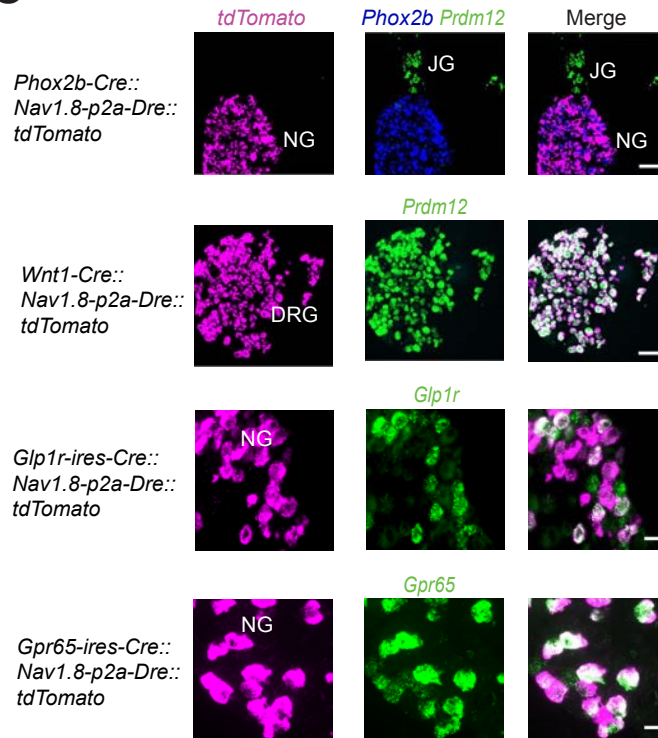**D**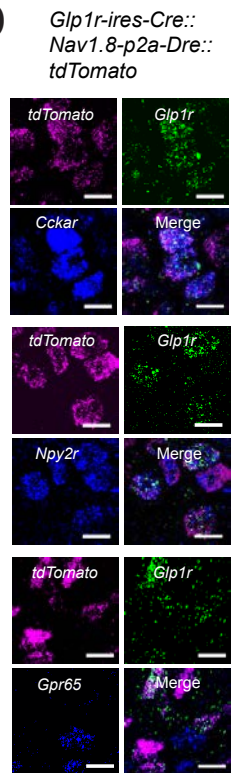**E**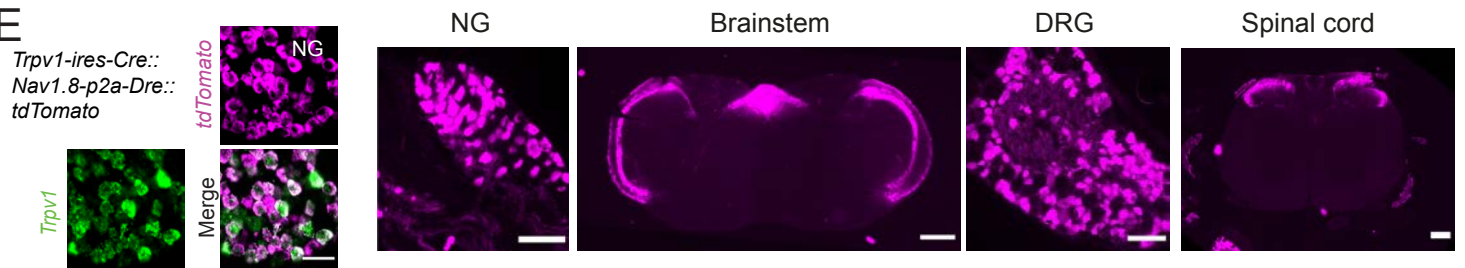**F**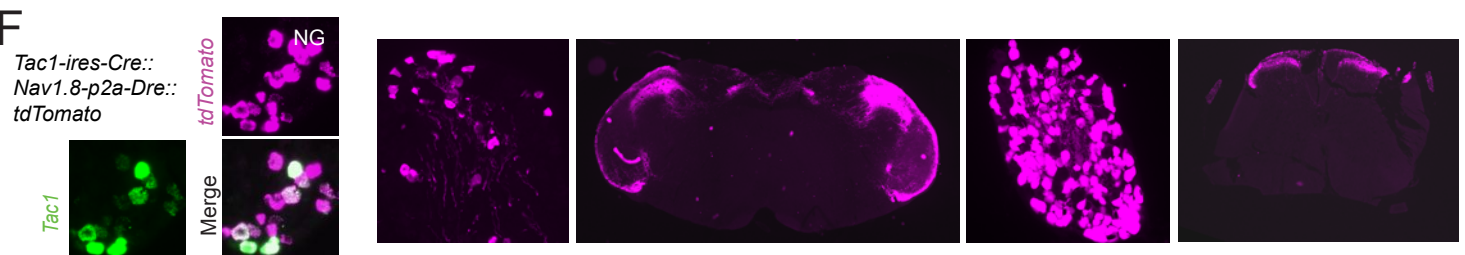**G**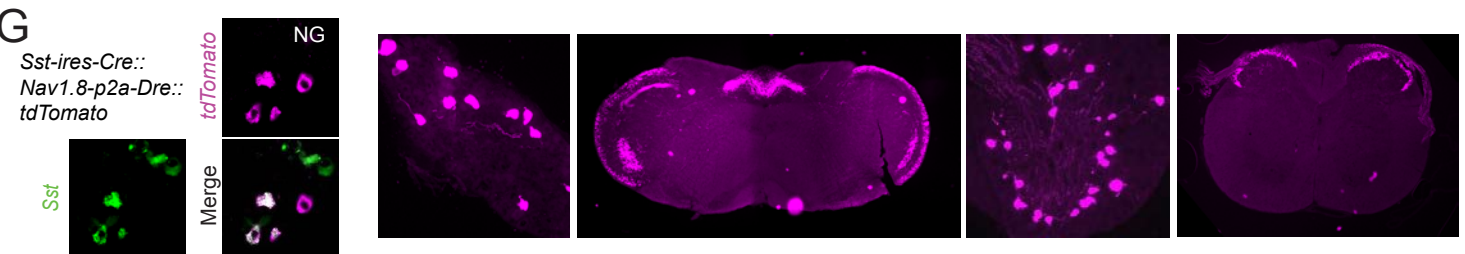**H**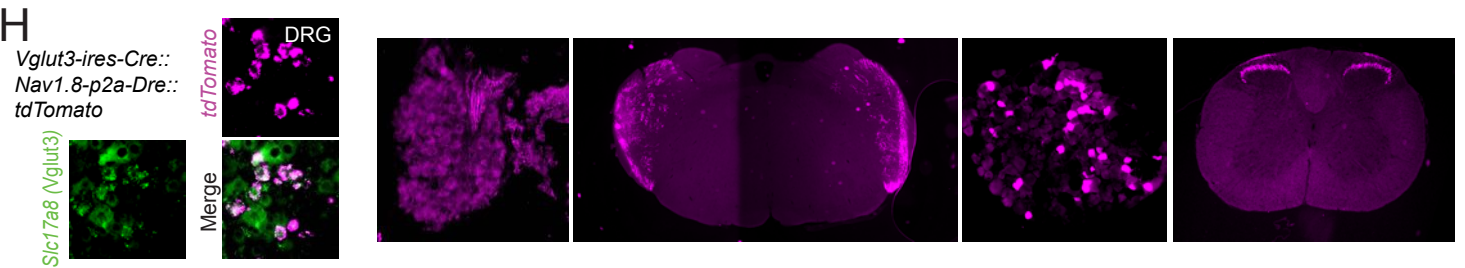

**Figure S1, Related to Figure 1: Generation and validation of *Nav1.8-p2a-Dre* mice, and inter-sectional mapping sensory neuron subtypes.**

**(A)** Schematic diagram of the *Nav1.8-p2a-Dre* allele. The p2a-Dre-cassette was targeted to the stop codon of the *Nav1.8* (*Scn10a*) gene.

**(B)** *Nav1.8-p2a-Dre* mice were crossed with Dre-dependent reporter mice for the expression of ZsGreen (Lohr et al., 2018). Colocalization of ZsGreen and endogenous *Nav1.8* (*Scn10a*; magenta) mRNA in *Nav1.8-p2a-Dre::ZsGreen* mice assessed by FISH. Scale bars represent 100  $\mu$ m.

**(C)** Representative images showing *tdTomato* (magenta) and endogenous mRNA expression in NG and DRG: *Phox2b* (blue), and *Prdm12* (green) in mice derived from *Phox2b-Cre* mice or *Wnt1-Cre* mice; *Glp1r* (green) in mice from *Glp1r-ires-Cre* mice; *Gpr65* (green) in mice from *Gpr65-ires-Cre* mice. No *tdTomato* was observed in DRG in mice derived from *Phox2b-Cre*, *Glp1r-ires-Cre* and *Gpr65-ires-Cre* mice. Scale bars represent 100  $\mu$ m (*Phox2b-Cre* and *Wnt1-Cre*) and 25  $\mu$ m (*Glp1r-ires-Cre* and *Gpr65-ires-Cre*).

**(D)** Representative images showing *tdTomato* (magenta), and endogenous *Glp1r* (green) and *Cckar*, *Npy2r*, or *Gpr65* (blue) expression in NG in mice derived from *Glp1r-ires-Cre* mice. Scale bars represent 20  $\mu$ m.

**(E-H)** Left: representative images showing *tdTomato* (magenta) and endogenous *Trpv1* **(E)**, *Tac1* **(F)**, *Sst* **(G)** and *Slc17a8* (Vglut3; green) **(H)** in NG or DRG assessed by FISH. Right: *tdTomato* (magenta) expression in NG, brainstem, DRG, and spinal cord in triple transgenic mice derived from *Trpv1-ires-Cre* **(E)**, *Tac1-ires-Cre* **(F)**, *Sst-ires-Cre* **(G)**, and *Vglut3-ires-Cre* **(H)** mice, assessed by immunohistochemistry.

Scale bars represent 50  $\mu$ m (FISH, NG), 100  $\mu$ m (NG and DRG), 500  $\mu$ m (brainstem), and 200  $\mu$ m (spinal cord).



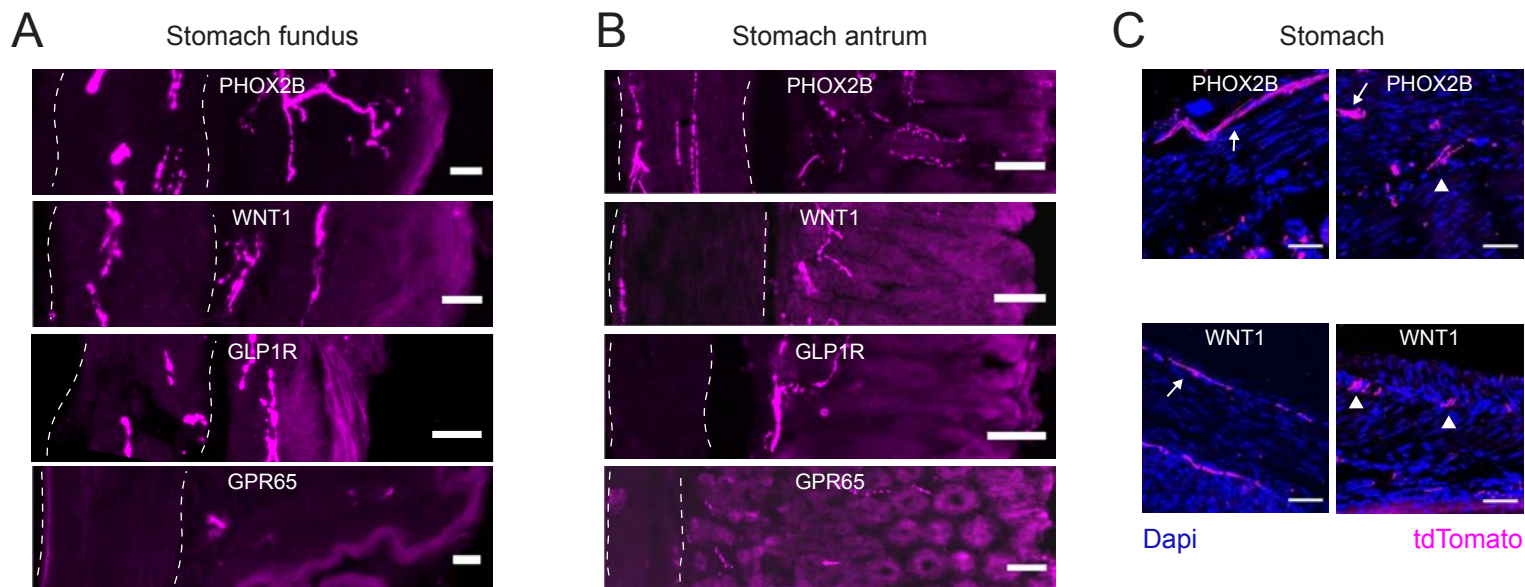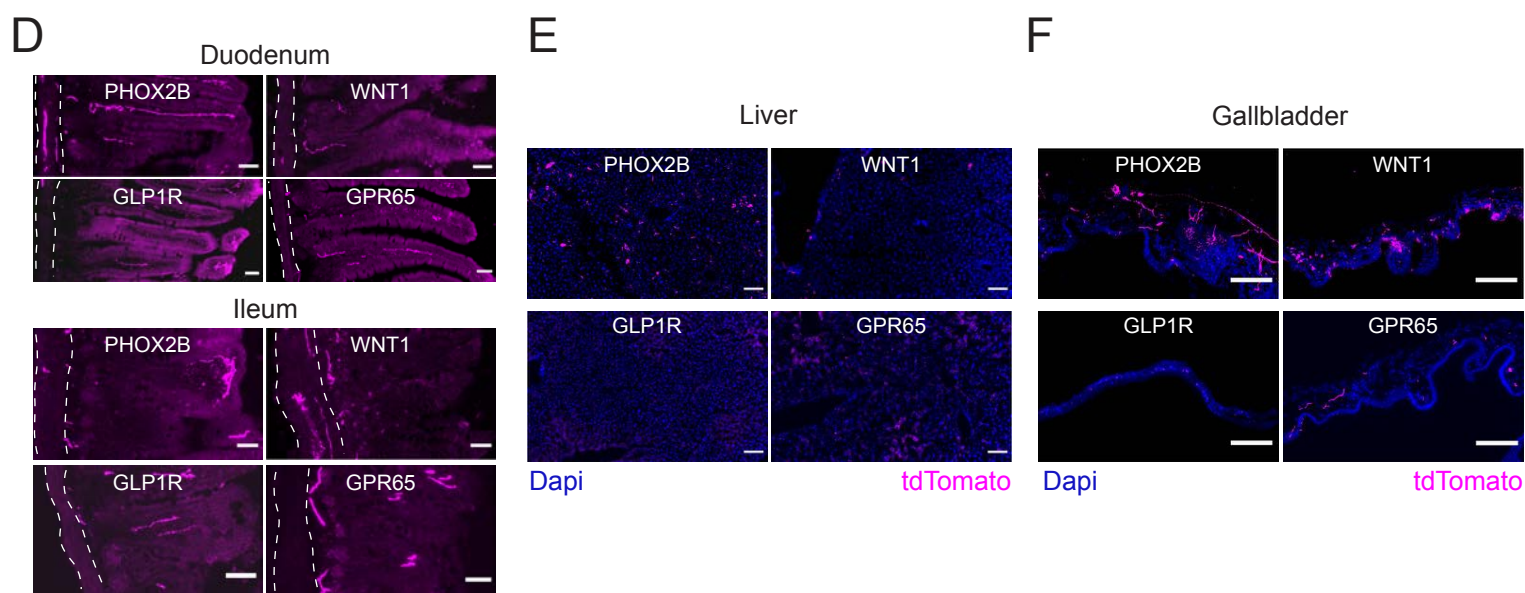

**G**

Relative innervation

|        | Trachea | Heart | Lung | Liver | Gallbladder | Kidney |
|--------|---------|-------|------|-------|-------------|--------|
| PHOX2B | +       | (+)   | +    | +++   | +++         | -      |
| WNT1   | ++++    | ++    | (+)  | -     | -           | (+)    |
| GLP1R  | (+)     | -     | -    | -     | -           | -      |
| GPR65  | -       | -     | -    | -     | (+)         | -      |

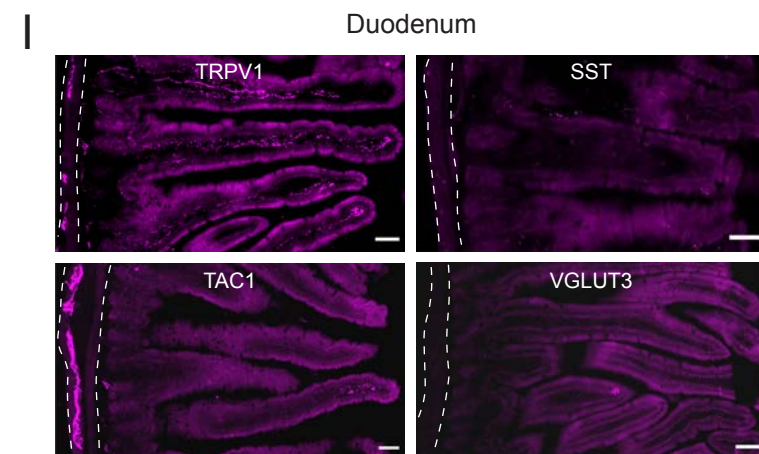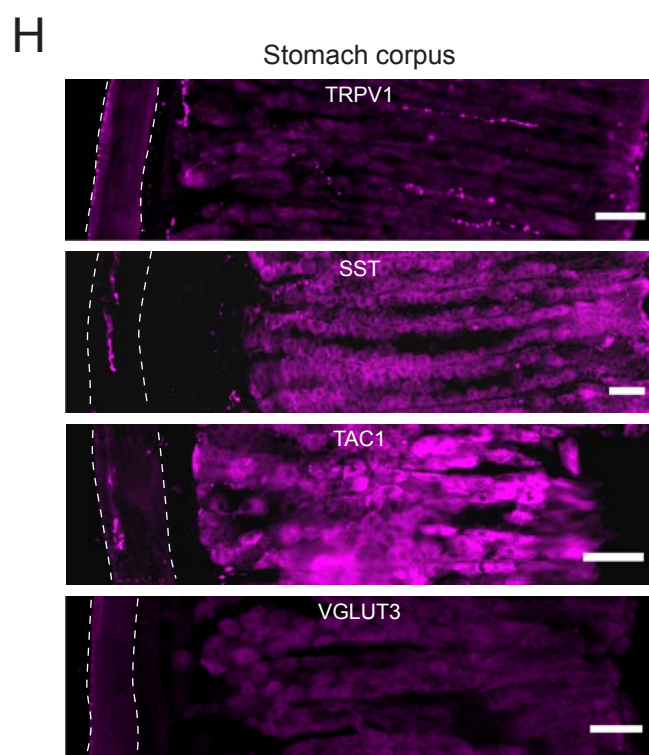

**Figure S2, Related to Figure 2: Organ innervation pattern of molecularly-defined sensory neuron populations.**

**(A-F)** Representative images showing tdTomato (magenta) expression in triple transgenic mice derived from *Phox2b-Cre*, *Wnt1-Cre*, *Glp1r-ires-Cre* and *Gpr65-ires-Cre* mice in stomach fundus **(A)** and antrum **(B)**, duodenum and ileum **(D)**, liver **(E)**, and gallbladder **(F)**, assessed by immunohistochemistry.

**(C)** Representative images showing innervation in muscularis propria of the stomach. Arrows indicate intramuscular array (IMA); arrow heads indicate intraganglionic laminar endings (IGLEs).

**(G)** Analysis of abdominal organ innervation by sensory neurons in triple transgenic mice derived from *Phox2b-Cre*, *Wnt1-Cre*, *Glp1r-ires-Cre* and *Gpr65-ires-Cre* mice assessed by tdTomato expression.

**(H, I)** Representative images showing tdTomato (magenta) expression in mice derived from *Trpv1-ires-Cre*, *Sst-ires-Cre*, *Tac1-ires-Cre* and *Vglut3-ires-Cre* mice in stomach corpus **(H)** and duodenum **(I)**.

Scale bars represent 50  $\mu\text{m}$ ; 25  $\mu\text{m}$  (fundus) and 100  $\mu\text{m}$  (liver and gallbladder). Dashed lines indicate muscular layer.

A

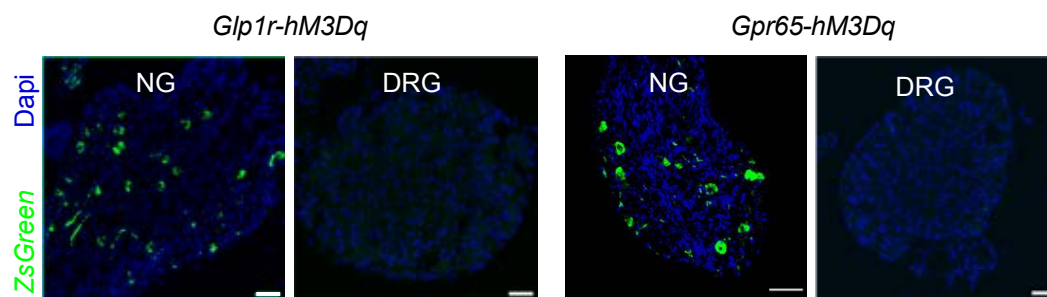

B

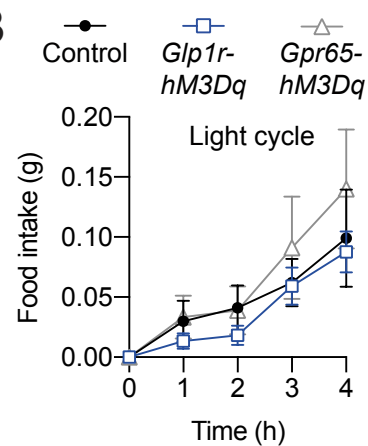

C

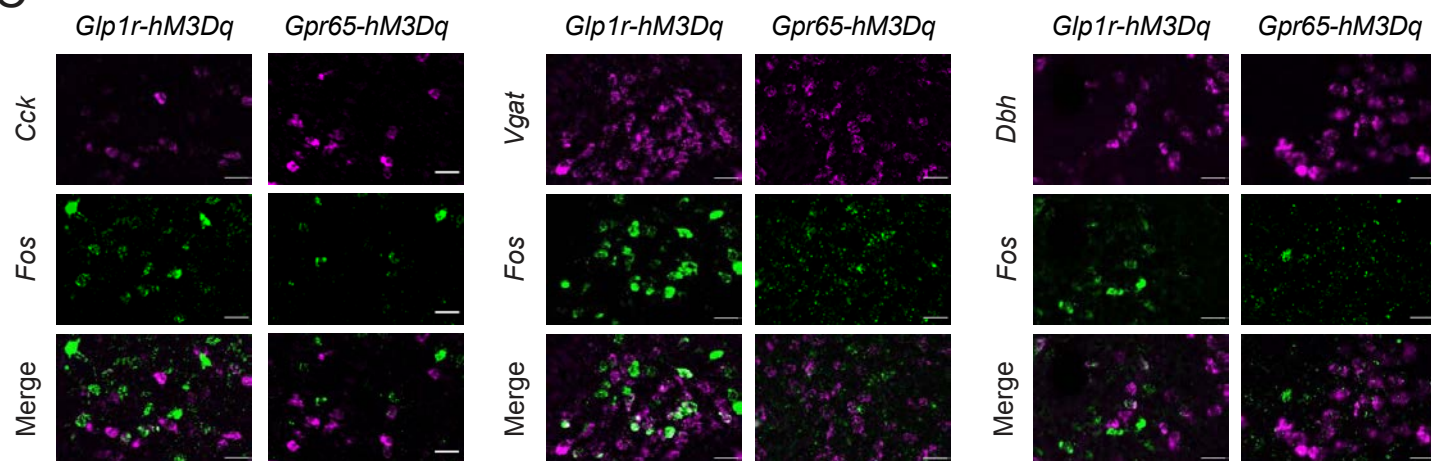

D

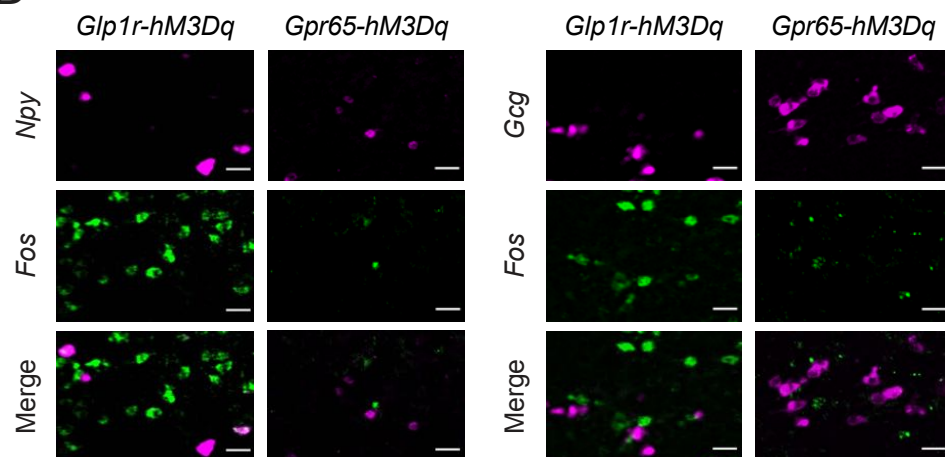

E

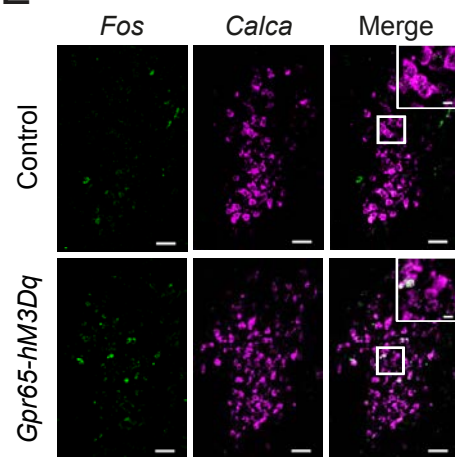

F

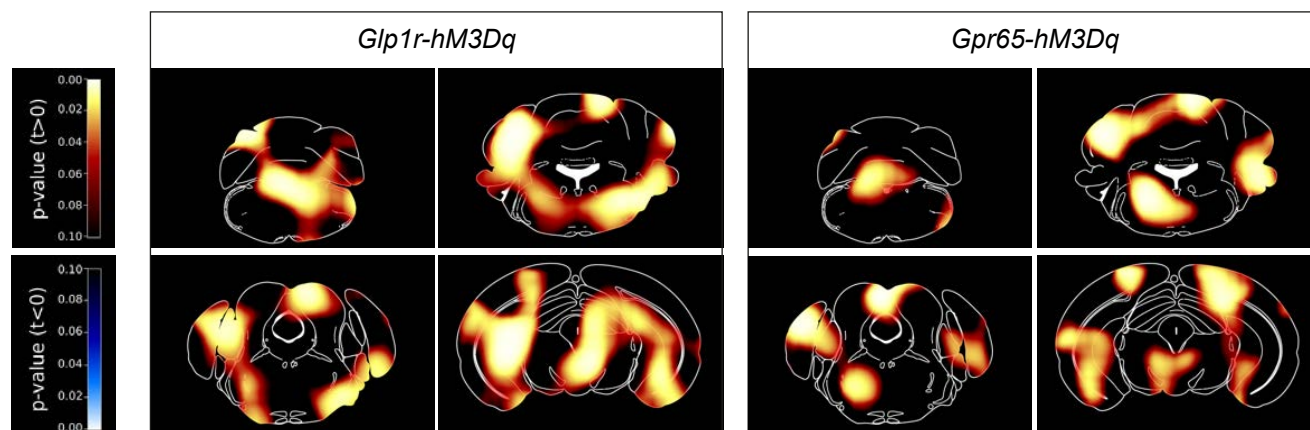

**Figure S3, Related to Figure 3: Regulation of feeding neurocircuits by GLP1R and GPR65 vagal afferents.**

**(A)** Expression of hM3Dq-zsGreen in NG and DRG. Scale bars represent 50  $\mu$ m. Quantitative analysis revealed that the number of GLP1R ZsGreen NG cells was about 2.5-fold as compared to GPR65 ZsGreen NG cells (GLP1R  $24.7 \pm 4.73$  versus GPR65  $10 \pm 1.87$ ; cells per section).

**(B)** Light cycle feeding during stimulation of GLP1R and GPR65 vagal afferents. Mice per group n=9-12.

**(C-E)** Representative images showing *Cck*, *Vgat*, *Dbh*, *Npy*, *Gcg* and *Fos* expression in the NTS (Bregma -7.48 - -7.92) after CNO-induced activation of GLP1R or GPR65 vagal afferents as assessed by FISH. Note that higher *Fos* mRNA was detected in NTS cells in response to GLP1R than GPR65 vagal afferent stimulation.

**(F)** Brain activation pattern upon stimulation of the two subtypes as assessed by [ $^{18}$ F]FDG PET (p values from voxelwise t-tests are indicated by color bar). Mice per group n=9-12

In all experiments, triple transgenic mice and littermate controls were injected with CNO. Mice are from multiple litters. Statistical significance was assessed by two-way mixed effects ANOVA with Dunnett's test for multiple comparisons **(B)** or two-tailed unpaired Student's t-test **(F)**. Values are presented as mean  $\pm$  SEM.



A

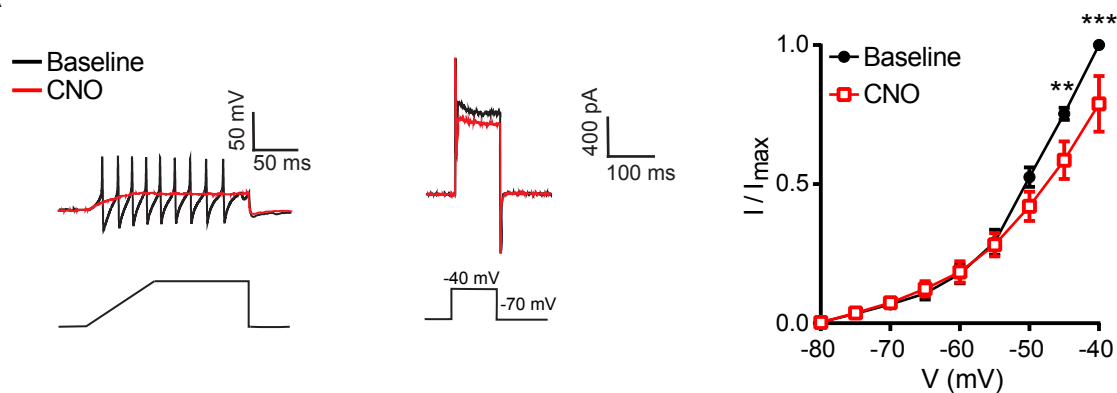

B

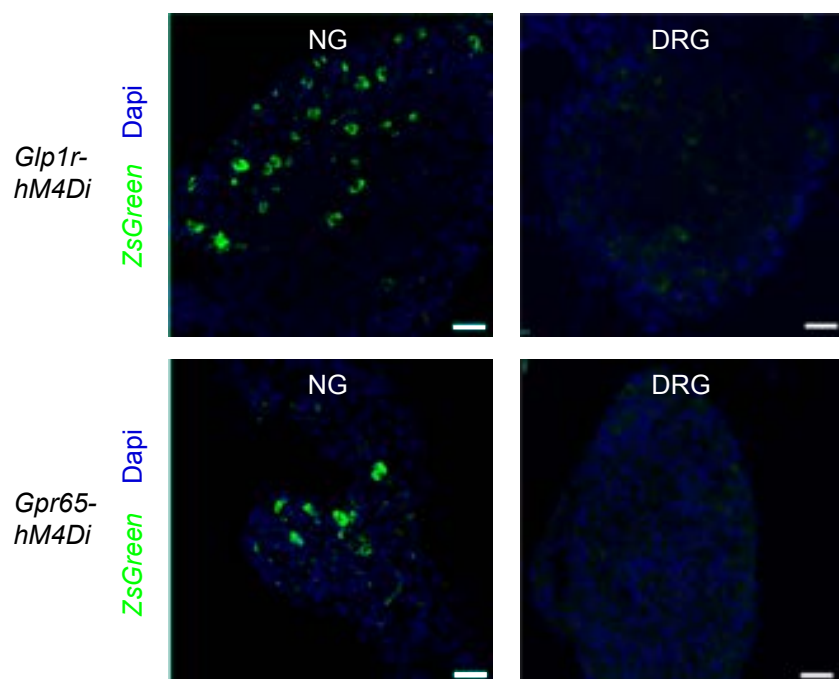

C

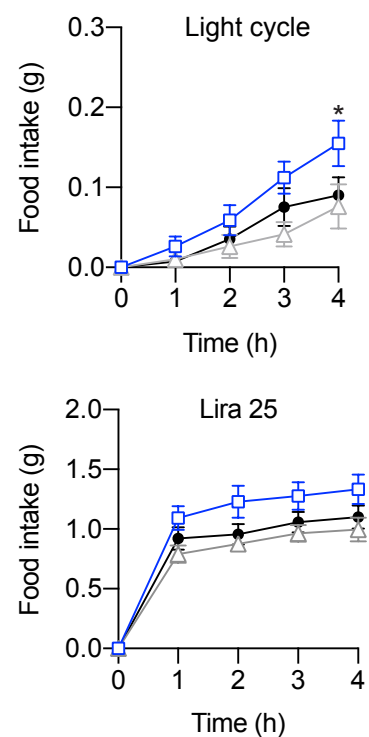

D

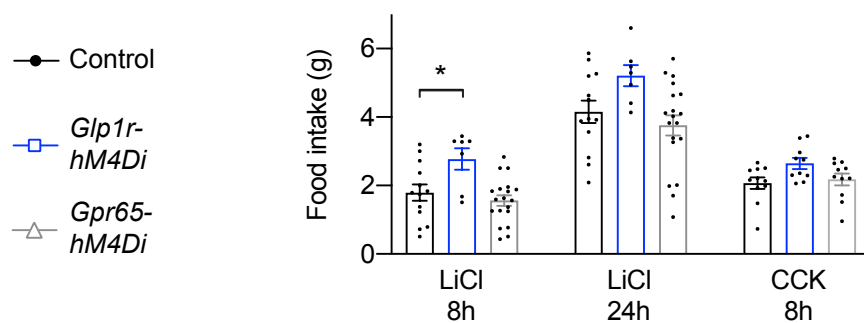

E

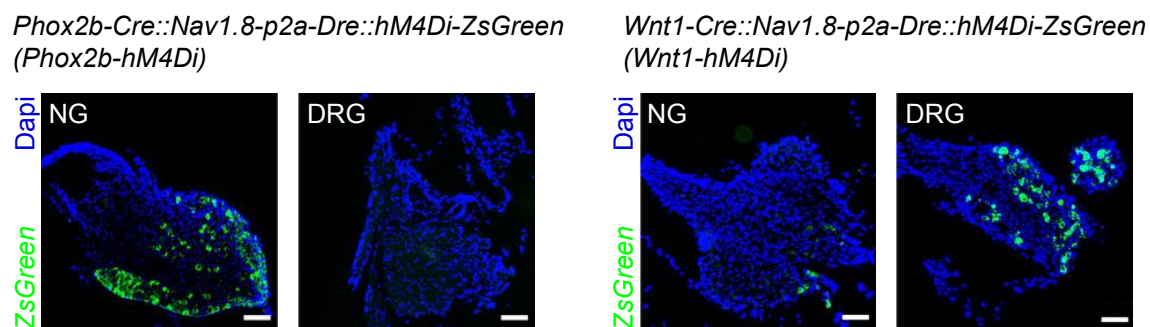



**Figure S4, Related to Figure 4: Validation of hM4Di-ZsGreen mice, and alterations in food intake upon inhibition of sensory neuron populations.**

**(A)** Representative traces (left) and summary (right) of CNO effects on hM4Di-expressing neurons.

Recordings were performed from ZsGreen-expressing DRG neurons from *Wnt1-Cre-hM4Di* mice. Neurons n=5 (mice n=5).

**(B)** Expression of hM4Di-ZsGreen in NG and DRG assessed by FISH. Scale bars represent 50  $\mu\text{m}$ .

**(C)** Effects of chemogenetically inhibiting GLP1R or GPR65 vagal afferents on light cycle feeding (top), and refeeding after 25  $\mu\text{g/kg}$  Liraglutide (bottom). Mice per group n=5-8.

**(D)** Long-term effects of chemogenetic inhibition of GLP1R or GPR65 vagal afferents on feeding after injection of LiCl or CCK. Mice per group n=7-19.

**(E)** Representative images showing expression of hM4Di-zsGreen in NG and DRG assessed by FISH. Scale bars represent 100  $\mu\text{m}$ .

In food intake experiments, triple transgenic mice and littermate controls were injected with CNO. Mice are from multiple litters. Statistical significance was assessed by repeated measures ANOVA with Bonferroni correction **(A)**, two-way mixed effects ANOVA **(C)** or ordinary one-way ANOVA **(D)** with Dunnett's test for multiple comparisons.

Significant results are indicated by \*  $p \leq 0.05$ , \*\*  $p \leq 0.01$  and \*\*\*  $p \leq 0.001$ . Values are presented as mean  $\pm$  SEM.

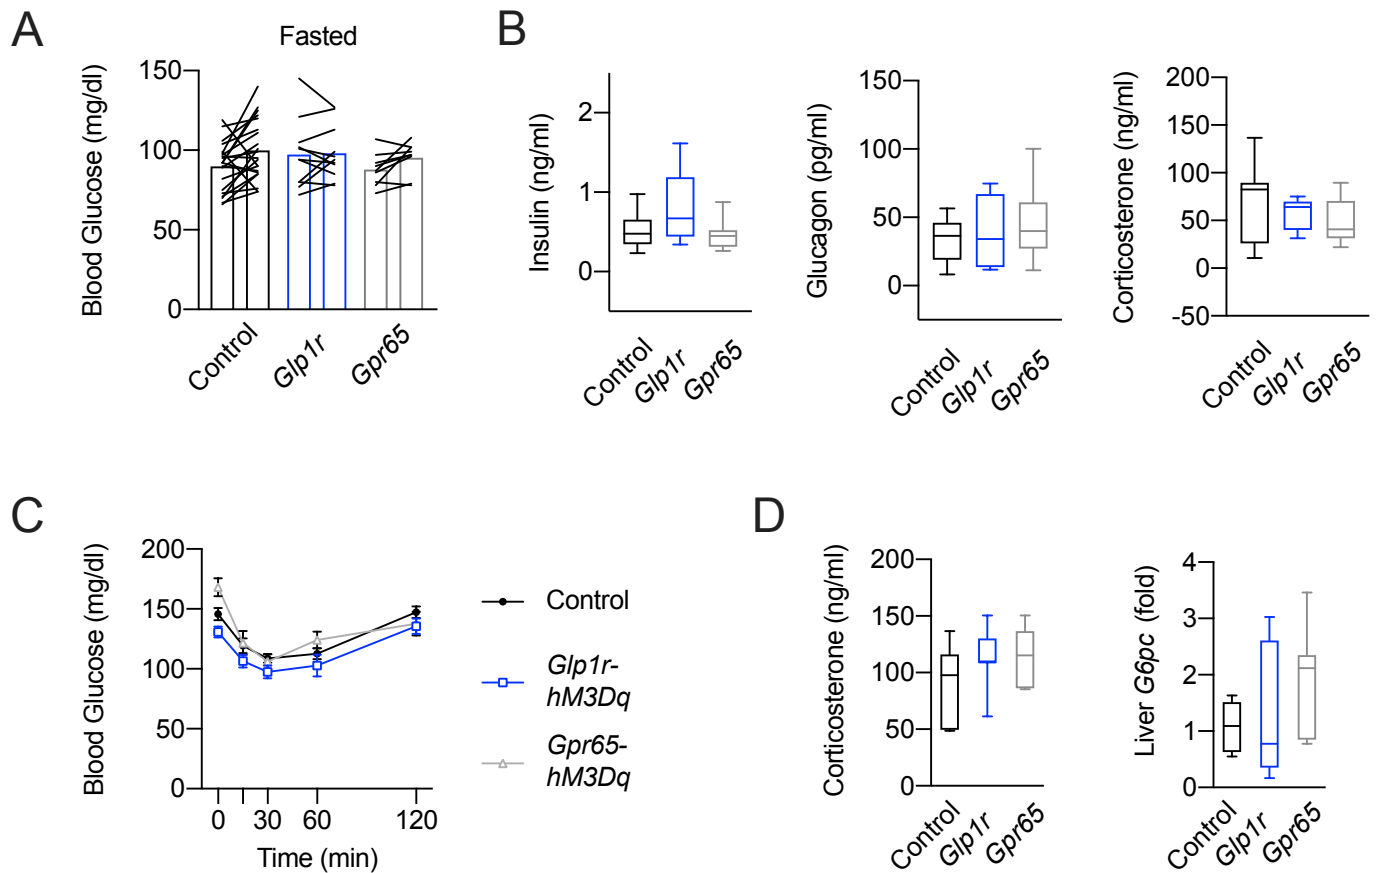

**Figure S5, Related to Figure 5: Regulation of glucose metabolism by GLP1R and GPR65 vagal afferents.**

**(A)** Effects of hM3Dq-induced stimulation of GLP1R or GPR65 vagal afferents on blood glucose levels in fasted mice.

**(B)** Analysis of plasma levels of insulin, glucagon, and corticosterone 1 hour after CNO injection. Mice per group n=5-12.

**(C)** Insulin tolerance after hM3Dq-induced activation of GLP1R or GPR65 vagal afferents. Mice per group n=9-20. Values are presented as mean  $\pm$  SEM.

**(D)** Analysis of plasma corticosterone levels and hepatic *G6pc* mRNA levels from clamp studies. Mice per group n=5-9.

In all experiments, triple transgenic mice and littermate controls were injected with CNO. Mice are from multiple litters. Statistical significance was assessed by two-tailed paired Student's t-test **(A)**, ordinary one-way ANOVA **(B,D)**, or two-way mixed effects ANOVA with Dunnett's test for multiple comparisons **(C)**.

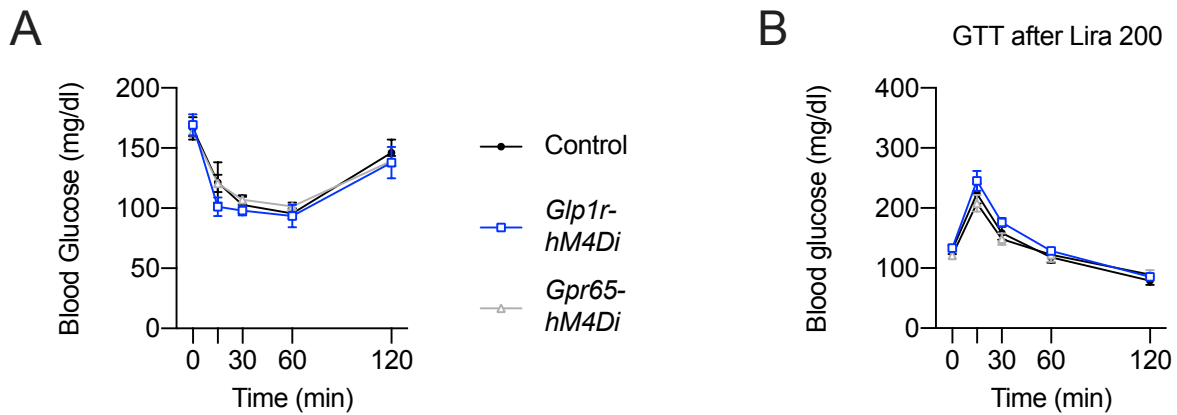

**Figure S6, Related to Figure 6: Effects of selective chemogenetic inhibition of GLP1R or GPR65 vagal afferents on glucose metabolism.**

**(A)** Insulin tolerance during hM4Di-induced inhibition of GLP1R or GPR65 vagal afferents. Mice per group n=5-8.

**(B)** Effects of hM4Di-induced inhibition of GLP1R or GPR65 vagal afferents on glucose tolerance during GTTs. Liraglutide (200 mg/kg) was administered 15 minutes before glucose injections. Mice per group n=4-11.

In all experiments, triple transgenic mice and littermate controls were injected with CNO. Mice are from multiple litters. Statistical significance was assessed by two-way mixed effects ANOVA with Dunnett's test for multiple comparisons. Values are presented as mean  $\pm$  SEM.

|           |                                                  |                           |                                                |                                                  |                                                 |                                            |                                                   |                            |
|-----------|--------------------------------------------------|---------------------------|------------------------------------------------|--------------------------------------------------|-------------------------------------------------|--------------------------------------------|---------------------------------------------------|----------------------------|
| A         | Nav1.8-p2a-Dre::<br>ZsGreen                      |                           | B                                              | Phox2b-Cre::<br>Nav1.8-p2a-Dre::<br>tdTomato     |                                                 | Wnt1-Cre::<br>Nav1.8-p2a-Dre::<br>tdTomato |                                                   |                            |
|           |                                                  |                           |                                                |                                                  |                                                 |                                            |                                                   |                            |
|           |                                                  |                           |                                                |                                                  |                                                 |                                            |                                                   |                            |
|           |                                                  |                           |                                                |                                                  |                                                 |                                            |                                                   |                            |
|           | <u>ZsGreen</u><br>Nav1.8+                        | <u>Nav1.8+</u><br>ZsGreen |                                                | <u>tdTomato</u><br>Phox2b+                       | <u>Phox2b+</u><br>tdTomato                      | <u>tdTomato</u><br>Prdm12+                 | <u>Prdm12+</u><br>tdTomato                        |                            |
| NG        | 98.33<br>± 1.67 %                                | 92.33<br>± 7.67 %         | NG                                             | 87.33<br>± 4.63 %                                | 100.00 %                                        | -                                          | -                                                 |                            |
| DRG       | 100.00 %                                         | 100.00 %                  | DRG                                            | -                                                | -                                               | 98.00<br>± 1.16 %                          | 97.67<br>± 1.45 %                                 |                            |
|           |                                                  |                           | JG                                             | -                                                | -                                               | 91.33<br>± 0.88 %                          | 94.33<br>± 0.88 %                                 |                            |
|           |                                                  |                           |                                                |                                                  |                                                 |                                            |                                                   |                            |
|           | Glp1r-ires-Cre::<br>Nav1.8-p2a-Dre::<br>tdTomato |                           |                                                | Gpr65-ires-Cre::<br>Nav1.8-p2a-Dre::<br>tdTomato |                                                 |                                            |                                                   |                            |
|           |                                                  |                           |                                                |                                                  |                                                 |                                            |                                                   |                            |
|           |                                                  |                           |                                                |                                                  |                                                 |                                            |                                                   |                            |
|           | <u>tdTomato</u><br>Glp1r+                        | <u>Glp1r+</u><br>tdTomato |                                                | <u>tdTomato</u><br>Gpr65+                        | <u>Gpr65+</u><br>tdTomato                       |                                            |                                                   |                            |
| NG        | 70.33<br>± 4.37 %                                | 67.33<br>± 9.68 %         |                                                | 96.00<br>± 4.00 %                                | 100.00 %                                        |                                            |                                                   |                            |
|           |                                                  |                           |                                                |                                                  |                                                 |                                            |                                                   |                            |
| C         | Trpv1-ires-Cre::<br>Nav1.8-p2a-Dre::<br>tdTomato |                           | Sst-ires-Cre::<br>Nav1.8-p2a-Dre::<br>tdTomato |                                                  | Tac1-ires-Cre::<br>Nav1.8-p2a-Dre::<br>tdTomato |                                            | Vglut3-ires-Cre::<br>Nav1.8-p2a-Dre::<br>tdTomato |                            |
|           |                                                  |                           |                                                |                                                  |                                                 |                                            |                                                   |                            |
|           |                                                  |                           |                                                |                                                  |                                                 |                                            |                                                   |                            |
|           |                                                  |                           |                                                |                                                  |                                                 |                                            |                                                   |                            |
|           | <u>tdTomato</u><br>Trpv1+                        | <u>Trpv1+</u><br>tdTomato | <u>tdTomato</u><br>Sst+                        | <u>Sst+</u><br>tdTomato                          | <u>tdTomato</u><br>Tac1+                        | <u>Tac1+</u><br>tdTomato                   | <u>tdTomato</u><br>Vglut3+                        | <u>Vglut3+</u><br>tdTomato |
| NG/<br>JG | 84.00<br>± 5.77 %                                | 93.67<br>± 5.36 %         | 81.00<br>± 19.00 %                             | 78.33<br>± 11.67 %                               | 85.00<br>± 8.66 %                               | 82.00<br>± 6.93 %                          | -                                                 | -                          |
| DRG       | 100.00 %                                         | 79.33<br>± 7.62 %         | 67.67<br>± 16.90 %                             | 100.00 %                                         | 88.67<br>± 1.86 %                               | 95.33<br>± 0.88 %                          | 60.33<br>± 13.86 %                                | 100.00 %                   |

**Table S1, related to Figure 1 and S1: Validation of double and triple transgenic mice.**

**(A-C)** Analysis of ZsGreen **(A)**, tdTomato **(B, C)**, and marker gene expression in NG, DRG, and JG.

Values are presented as mean +/- SEM.
